# Supplementary material
Source: PubMed Central journal article supplement (PMC4284824)
Supplement: NIHMS650193-supplement-Supplement1.pdf [file NIHMS650193-supplement-Supplement1.pdf]

## Supplementary Appendix

This appendix has been provided by the authors to give readers additional information about their work.

Supplement to: Torres VE, Abebe KZ, Chapman AB, et al. Angiotensin blockade in late autosomal dominant polycystic kidney disease. *N Engl J Med* 2014;371:2267-76. DOI: 10.1056/NEJMoa1402686

**Supplementary Appendix:**

Angiotensin Blockade in Late Autosomal Dominant Polycystic Kidney Disease

Vicente E. Torres MD, PhD; Kaleab Z. Abebe PhD; Arlene B. Chapman MD; Robert W. Schrier MD; William E. Braun MD; Theodore I. Steinman MD; Franz T. Winklhofer MD; Godela Brosnahan MD; Peter G. Czarnecki MD; Marie C. Hogan MD, PhD; Dana C. Miskulin MD; Frederic F. Rahbari-Oskoui MD; Jared J. Grantham MD; Peter C. Harris, PhD; Michael F. Flessner MD, PhD; Charity G. Moore PhD, MSPH; and Ronald D. Perrone MD; for the HALT PKD Trial Investigators.

## Table of Contents

|                                                                                                                                                                                                                           |    |
|---------------------------------------------------------------------------------------------------------------------------------------------------------------------------------------------------------------------------|----|
| HALT-PKD Study Team Members .....                                                                                                                                                                                         | 3  |
| Figure S1. Achievement of blood pressure targets.....                                                                                                                                                                     | 4  |
| Table S1. Protocol for Addition of Antihypertensive Agents .....                                                                                                                                                          | 5  |
| Table S2. Additional characteristics of Study B participants at screening or baseline .....                                                                                                                               | 6  |
| Table S3: Home and office blood pressures, heart rates, medication steps, and doses of lisinopril and telmisartan/placebo at baseline and study visits.....                                                               | 8  |
| Table S4: Percentage of patients on medication step $\leq 4$ by treatment group and visit.....                                                                                                                            | 13 |
| Table S5A: Percentage of patients categorized by dose of lisinopril, treatment group and visit.....                                                                                                                       | 14 |
| Table S5B: Percentage of patients categorized by dose of telmisartan/placebo treatment group and visit.....                                                                                                               | 14 |
| Table S6: Open label anti-hypertensive agents added at any time after maximal doses of lisinopril and telmisartan/placebo.....                                                                                            | 15 |
| Table S7A: Secondary outcomes of eGFR, urine albumin excretion, frequencies of PKD related symptoms, pain, and quality of life. Participants were asked about the occurrence of symptoms every 3 months per protocol..... | 16 |
| Table S7B: Results of models testing secondary outcomes of eGFR, urine albumin excretion, frequencies of PKD related symptoms, pain, and quality of life.....                                                             | 21 |
| Table S8: Common symptoms reported by participants (participants were asked about presence of symptoms every 3 months).....                                                                                               | 23 |
| Table S9: Adverse events with potentially increased risk previously found to be associated with study drug.....                                                                                                           | 24 |

## **HALT-PKD Study Team Members**

In addition to the authors, the following investigators participated in the HALT Progression of Polycystic Kidney Disease (HALT PKD) Trials:

**Beth Israel Deaconess Medical Center:** Theodore Steinman, MD, Jesse Wei, MD, Peter Czarnecki, MD, Ivan Pedrosa, MD; **Cleveland Clinic Foundation:** William Braun, MD, Saul Nurko, MD, Erick Remer, MD; **Emory University:** Arlene Chapman, MD, Diego Martin, MD, PhD, Frederic Rahbari-Oskoui, MD, MS, Pardeep Mittal, MD; **Mayo Clinic:** Vicente Torres, MD, PhD, Marie C. Hogan, MD, PhD, Ziad El-Zoghby, MD, Peter Harris, PhD, James Glockner, MD, PhD, Bernard King Jr, MD; **Tufts Medical Center:** Ronald Perrone, MD, Neil Halin, DO, Dana Miskulin, MD; **University of Colorado:** Robert Schrier, MD, Godela Brosnahan, MD, Berenice Gitomer, PhD, Cass Kelleher, MD, Amirali Masoumi, MD, Nayana Patel, MD; **University of Kansas Medical Center:** Franz Winklhofer, MD, Jared Grantham, MD, Alan Yu, MB, B Chir, Connie Wang, MD, Louis Wetzel, MD; **University of Pittsburgh (Data Coordinating Center):** Charity G. Moore, PhD, MSPH, James E. Bost, PhD, Kyongtae Bae, MD, Kaleab Z. Abebe; **Washington University in St. Louis (Data Coordinating Center):** J. Philip Miller, PhD, Paul A. Thompson; **National Institutes of Health (NIH):** Josephine Briggs, MD, Michael Flessner, MD, Catherine M. Meyers, MD, and Robert Star, MD.

**Data and Safety Monitoring Committee:** James Shayman, MD, (Chair), William Henrich, MD, (Former Chair), Tom Greene, PhD, Mary Leonard, MD, MSCE, Peter McCullough, MD, PhD, Sharon Moe, MD, Michael Rocco, MD, and David Wendler, PhD.

**Figure S1.** Achievement of blood pressure targets.

Percent of participants with systolic (Panels A and B), diastolic (Panels C and D) and mean (Panels E and F) blood pressures below, within or above targets in the lisinopril/telmisartan (Panels A, C and E) and lisinopril/placebo (Panels B, D and F) groups.

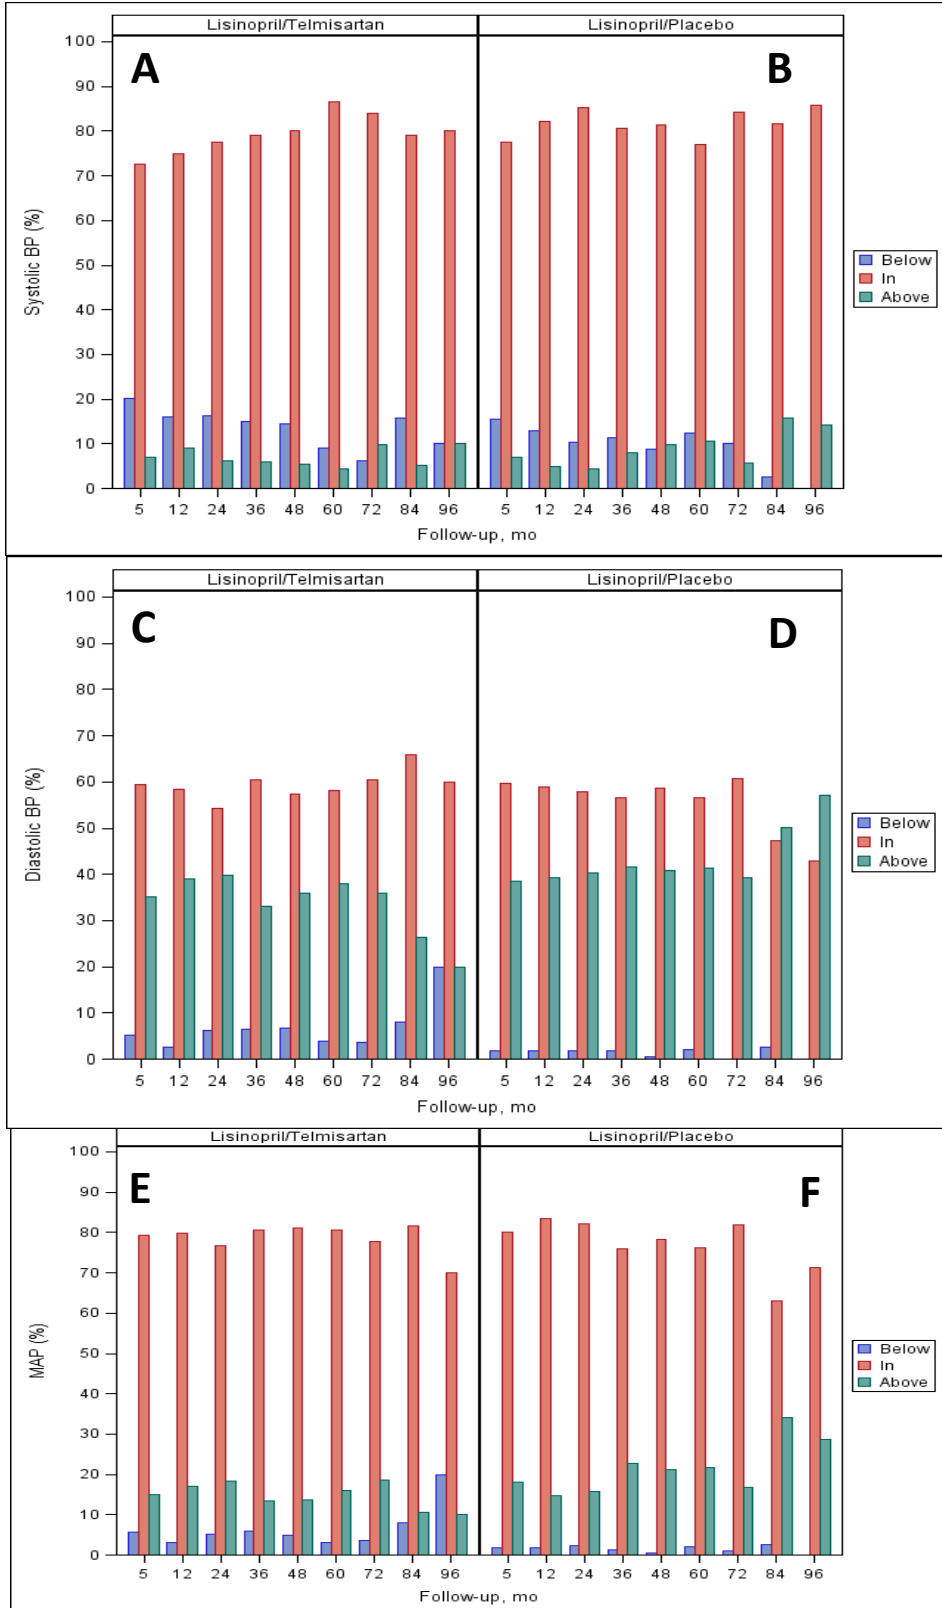

**Table S1. Protocol for Addition of Antihypertensive Agents**

| Step           | Telmisartan                                                                                                   |                                                                                                | Placebo                                                                                                       |                                                                                    |
|----------------|---------------------------------------------------------------------------------------------------------------|------------------------------------------------------------------------------------------------|---------------------------------------------------------------------------------------------------------------|------------------------------------------------------------------------------------|
| 1-4            | <u>ACE-I</u><br>Lisinopril 5mg<br>Lisinopril 10mg<br>Lisinopril 20mg<br>Lisinopril 40mg                       | <u>ARB</u><br>Telmisartan 40 mg<br>Telmisartan 40 mg<br>Telmisartan 80 mg<br>Telmisartan 80 mg | <u>ACE-I</u><br>Lisinopril 5mg<br>Lisinopril 10mg<br>Lisinopril 20mg<br>Lisinopril 40mg                       | <u>Placebo</u><br>Placebo 40 mg<br>Placebo 40 mg<br>Placebo 80 mg<br>Placebo 80 mg |
| 5-6            | Furosemide 20 mg - 40 mg BID                                                                                  |                                                                                                | Furosemide 20 mg - 40 mg BID                                                                                  |                                                                                    |
| 7-9            | Metoprolol 50 mg BID<br>Metoprolol 100 mg BID<br>Metoprolol 200 mg BID                                        |                                                                                                | Metoprolol 50 mg BID<br>Metoprolol 100 mg BID<br>Metoprolol 200 mg BID                                        |                                                                                    |
| 10 and onwards | Non-dihydropyridine calcium channel blockers, clonidine, minoxidil, hydralazine at discretion of investigator |                                                                                                | Non-dihydropyridine calcium channel blockers, clonidine, minoxidil, hydralazine at discretion of investigator |                                                                                    |

**Table S2. Additional characteristics of Study B participants at screening or baseline**

|                          |                                  | <b>Lisinopril/<br/>Telmisartan<br/>(n=244)</b> | <b>Lisinopril/<br/>Placebo<br/>(n=242)</b> |
|--------------------------|----------------------------------|------------------------------------------------|--------------------------------------------|
| <b>Measure</b>           | <b>Category</b>                  | <b>n (%)</b>                                   | <b>n (%)</b>                               |
| Race*                    | American Indian or Alaska Native | 2 (0.8%)                                       | 2 (0.8%)                                   |
|                          | Asian                            | 2 (0.8%)                                       | 5 (2.1%)                                   |
|                          | Black or African American        | 5 (2.0%)                                       | 7 (2.9%)                                   |
|                          | White or Caucasian               | 230 (94.3%)                                    | 224 (92.6%)                                |
|                          | Some Other Race                  | 4 (1.6%)                                       | 4 (1.7%)                                   |
| Highest education level  | Some high school                 | 0 (0.0%)                                       | 2 (0.8%)                                   |
|                          | Completed HS or Equivalent       | 31 (12.8%)                                     | 22 (9.1%)                                  |
|                          | Some college                     | 62 (25.6%)                                     | 55 (22.7%)                                 |
|                          | Completed college                | 74 (30.6%)                                     | 86 (35.5%)                                 |
| Marital status           | Graduate studies                 | 75 (31.0%)                                     | 77 (31.8%)                                 |
|                          | Single                           | 24 (9.9%)                                      | 28 (11.6%)                                 |
|                          | Married                          | 189 (77.8%)                                    | 174 (71.9%)                                |
|                          | Divorced                         | 23 (9.5%)                                      | 30 (12.4%)                                 |
| Employment*              | Separated                        | 1 (0.4%)                                       | 3 (1.2%)                                   |
|                          | Widowed                          | 5 (2.1%)                                       | 3 (1.2%)                                   |
|                          | Other                            | 1 (0.4%)                                       | 4 (1.7%)                                   |
|                          | Student                          | 5 (2.0%)                                       | 6 (2.5%)                                   |
|                          | Homemaker                        | 17 (7.0%)                                      | 26 (10.7%)                                 |
|                          | Retired                          | 18 (7.4%)                                      | 21 (8.7%)                                  |
|                          | Disabled                         | 5 (2.0%)                                       | 4 (1.7%)                                   |
| Diagnosis due to         | Full-Time Employment             | 169 (69.3%)                                    | 173 (71.5%)                                |
|                          | Part-Time Employment             | 31 (12.7%)                                     | 19 (7.9%)                                  |
|                          | Other                            | 7 (2.9%)                                       | 5 (2.1%)                                   |
|                          | Screening                        | 96 (39.3%)                                     | 88 (36.4%)                                 |
|                          | Hypertension                     | 32 (13.1%)                                     | 37 (15.3%)                                 |
|                          | Other                            | 30 (12.3%)                                     | 35 (14.5%)                                 |
|                          | Pain                             | 30 (12.3%)                                     | 22 (9.1%)                                  |
| Diagnosis of ADPKD, Mode | Incidental imaging               | 23 (9.4%)                                      | 24 (9.9%)                                  |
|                          | Hematuria                        | 13 (5.3%)                                      | 20 (8.3%)                                  |
|                          | Routine physical                 | 15 (6.1%)                                      | 12 (5.0%)                                  |
|                          | UTI                              | 5 (2.0%)                                       | 4 (1.7%)                                   |
|                          | Ultrasound                       | 174 (71.3%)                                    | 177 (73.1%)                                |
|                          | CT                               | 29 (11.9%)                                     | 25 (10.3%)                                 |
|                          | IVP                              | 15 (6.1%)                                      | 16 (6.6%)                                  |
| Diagnosis of ADPKD, Mode | MRI                              | 12 (4.9%)                                      | 11 (4.5%)                                  |
|                          | Unknown                          | 5 (2.0%)                                       | 5 (2.1%)                                   |
|                          | X-Ray                            | 5 (2.0%)                                       | 4 (1.7%)                                   |

|                                                     |                     | <b>Lisinopril/<br/>Telmisartan<br/>(n=244)</b> | <b>Lisinopril/<br/>Placebo<br/>(n=242)</b> |
|-----------------------------------------------------|---------------------|------------------------------------------------|--------------------------------------------|
| <b>Measure</b>                                      | <b>Category</b>     | <b>n (%)</b>                                   | <b>n (%)</b>                               |
|                                                     | Other               | 2 (0.8%)                                       | 4 (1.7%)                                   |
|                                                     | Angiogram           | 2 (0.8%)                                       | 0 (0.0%)                                   |
| Family History of ADPKD, no. (%)                    |                     | 214 (87.7)                                     | 212 (87.6)                                 |
| Antihypertensive medication use at Screening        |                     |                                                |                                            |
|                                                     | Any ARB             | 61 (25.4%)                                     | 57 (23.8%)                                 |
|                                                     | Any Ace Inhibitor   | 132 (55.0%)                                    | 133 (55.6%)                                |
|                                                     | Any Alpha Blocker   | 17 (7.1%)                                      | 16 (6.7%)                                  |
|                                                     | Any Beta Blocker    | 47 (19.6%)                                     | 49 (20.5%)                                 |
|                                                     | Any Calcium Blocker | 40 (16.7%)                                     | 35 (14.6%)                                 |
|                                                     | Any Diuretic        | 48 (20.0%)                                     | 42 (17.6%)                                 |
| <b>Measure</b>                                      |                     | <b>Mean ± SD</b>                               | <b>Mean ± SD</b>                           |
| Age at diagnosis of ADPKD (yrs)                     |                     | 33.0 ± 12.0                                    | 33.5 ± 12.4                                |
| Age at diagnosis of HTN (yrs)                       |                     | 36.2 ± 10.2                                    | 36.7 ± 10.2                                |
| Height (cm)                                         |                     | 173.2 ± 10.5                                   | 173.1 ± 10.4                               |
| BSA (m <sup>2</sup> )                               |                     | 2.0 ± 0.2                                      | 2.0 ± 0.3                                  |
| Office systolic BP at screening (mmHg) <sup>§</sup> |                     | 123.2 ± 16.2                                   | 119.7 ± 14.8                               |
| Office diastolic BP at screening (mmHg)             |                     | 76.3 ± 11.6                                    | 75.5 ± 10.2                                |
| Office MAP at screening (mmHg)                      |                     | 92.0 ± 12.1                                    | 90.2 ± 10.7                                |
| Hemoglobin (g/dL)                                   |                     | 13.8 ± 1.4                                     | 13.7 ± 1.5                                 |
| S. sodium (mEq/L)                                   |                     | 139.4 ± 2.5                                    | 139.5 ± 2.3                                |
| S. potassium (mEq/L)                                |                     | 4.3 ± 0.5                                      | 4.3 ± 0.5                                  |
| Urea Nitrogen (BUN) mg/dL                           |                     | 24.4 ± 7.5                                     | 24.4 ± 7.6                                 |
| Total CO2 mEq/L or mmol/L                           |                     | 26.2 ± 2.6                                     | 26.5 ± 2.4                                 |
| Urine volume (ml/24 hrs)                            |                     | 2684 ± 1047                                    | 2686 ± 1100                                |
| Urine potassium (mEq/24 hrs)                        |                     | 64.6 ± 27.9                                    | 60.6 ± 24.9                                |

\*Some participants selected >1 category; †p-value on the comparison of the transformed variable

<sup>§</sup> P<0.05 for the comparison between lisinopril/telmisartan and lisinopril/placebo.



**Table S3: Home and office blood pressures, heart rates, medication steps, and doses of lisinopril and telmisartan/placebo at baseline and study visits.**

| Measure                          | Timepoint | Lisinopril/<br>Telmisartan<br>(n=244) |              | Lisinopril/<br>Placebo<br>(n=242) |              |
|----------------------------------|-----------|---------------------------------------|--------------|-----------------------------------|--------------|
|                                  |           | n                                     | Mean ± SD    | n                                 | Mean ± SD    |
| Home average systolic BP (mmHg)  | B1        | 187                                   | 125.4 ± 11.3 | 184                               | 123.7 ± 10.3 |
|                                  | F5        | 207                                   | 115.9 ± 7.9  | 218                               | 117.5 ± 8.6  |
|                                  | F12       | 204                                   | 116.7 ± 7.8  | 210                               | 117.9 ± 6.7  |
|                                  | F18       | 200                                   | 117.4 ± 6.7  | 205                               | 118.4 ± 7.6  |
|                                  | F24       | 194                                   | 117.2 ± 7.1  | 207                               | 118.9 ± 6.9  |
|                                  | F30       | 188                                   | 118.4 ± 7.2  | 197                               | 119.3 ± 7.9  |
|                                  | F36       | 181                                   | 117.2 ± 6.9  | 196                               | 119.0 ± 8.2  |
|                                  | F42       | 174                                   | 118.3 ± 6.8  | 172                               | 119.6 ± 7.7  |
|                                  | F48       | 159                                   | 117.4 ± 7.0  | 162                               | 119.4 ± 8.1  |
|                                  | F54       | 150                                   | 119.1 ± 7.6  | 145                               | 120.1 ± 8.7  |
|                                  | F60       | 130                                   | 118.3 ± 6.0  | 129                               | 119.1 ± 8.1  |
|                                  | F66       | 107                                   | 119.9 ± 6.8  | 103                               | 120.1 ± 8.4  |
|                                  | F72       | 70                                    | 118.5 ± 7.0  | 84                                | 119.2 ± 7.3  |
|                                  | F78       | 54                                    | 120.3 ± 7.3  | 55                                | 120.7 ± 8.4  |
|                                  | F84       | 32                                    | 120.0 ± 6.1  | 33                                | 123.0 ± 8.0  |
|                                  | F90       | 18                                    | 121.1 ± 5.7  | 18                                | 123.3 ± 14.0 |
| F96                              | 8         | 122.3 ± 9.0                           | 7            | 121.2 ± 7.8                       |              |
| Home average diastolic BP (mmHg) | B1        | 187                                   | 82.1 ± 8.4   | 184                               | 81.5 ± 7.8   |
|                                  | F5        | 207                                   | 77.7 ± 6.6   | 219                               | 78.9 ± 6.3   |
|                                  | F12       | 204                                   | 78.2 ± 6.4   | 210                               | 78.9 ± 5.4   |
|                                  | F18       | 200                                   | 78.7 ± 6.5   | 205                               | 79.0 ± 5.7   |
|                                  | F24       | 194                                   | 78.4 ± 6.9   | 207                               | 79.2 ± 5.5   |
|                                  | F30       | 189                                   | 78.7 ± 6.2   | 197                               | 79.3 ± 6.1   |
|                                  | F36       | 181                                   | 77.9 ± 6.3   | 196                               | 79.1 ± 6.0   |
|                                  | F42       | 174                                   | 78.4 ± 6.0   | 172                               | 79.2 ± 6.0   |
|                                  | F48       | 159                                   | 77.5 ± 6.8   | 162                               | 79.0 ± 5.8   |
|                                  | F54       | 150                                   | 78.8 ± 6.3   | 145                               | 79.4 ± 5.9   |
|                                  | F60       | 130                                   | 78.5 ± 6.3   | 129                               | 79.1 ± 5.9   |
|                                  | F66       | 107                                   | 79.3 ± 6.4   | 103                               | 79.2 ± 5.7   |
|                                  | F72       | 70                                    | 78.1 ± 7.1   | 84                                | 79.2 ± 5.1   |
|                                  | F78       | 54                                    | 78.4 ± 6.2   | 55                                | 80.1 ± 5.5   |
|                                  | F84       | 32                                    | 76.7 ± 6.0   | 33                                | 80.0 ± 5.6   |
|                                  | F90       | 18                                    | 74.9 ± 5.1   | 18                                | 78.6 ± 6.5   |
| F96                              | 8         | 74.4 ± 7.5                            | 7            | 81.3 ± 6.3                        |              |
| Home average heart rate (bpm)    | B1        | 178                                   | 65.5 ± 9.5   | 172                               | 65.2 ± 9.6   |
|                                  | F5        | 197                                   | 69.9 ± 10.1  | 213                               | 68.2 ± 9.7   |

|                                   |           | Lisinopril/<br>Telmisartan<br>(n=244) |              | Lisinopril/<br>Placebo<br>(n=242) |              |
|-----------------------------------|-----------|---------------------------------------|--------------|-----------------------------------|--------------|
| Measure                           | Timepoint | n                                     | Mean ± SD    | n                                 | Mean ± SD    |
|                                   | F12       | 193                                   | 69.3 ± 9.6   | 204                               | 68.1 ± 9.7   |
|                                   | F18       | 191                                   | 68.6 ± 9.2   | 196                               | 67.9 ± 9.3   |
|                                   | F24       | 189                                   | 68.2 ± 9.0   | 201                               | 67.4 ± 9.7   |
|                                   | F30       | 182                                   | 68.7 ± 9.1   | 194                               | 68.1 ± 9.7   |
|                                   | F36       | 176                                   | 69.4 ± 10.0  | 188                               | 67.0 ± 9.3   |
|                                   | F42       | 169                                   | 68.8 ± 9.8   | 165                               | 67.3 ± 9.9   |
|                                   | F48       | 153                                   | 69.1 ± 9.7   | 158                               | 67.3 ± 9.3   |
|                                   | F54       | 145                                   | 68.7 ± 9.0   | 140                               | 67.8 ± 10.2  |
|                                   | F60       | 128                                   | 69.3 ± 9.3   | 122                               | 67.3 ± 9.4   |
|                                   | F66       | 104                                   | 69.4 ± 10.4  | 100                               | 67.8 ± 9.7   |
|                                   | F72       | 66                                    | 70.8 ± 10.4  | 77                                | 68.5 ± 10.3  |
|                                   | F78       | 52                                    | 69.4 ± 9.7   | 54                                | 68.9 ± 10.1  |
|                                   | F84       | 31                                    | 69.2 ± 10.0  | 32                                | 67.0 ± 9.9   |
|                                   | F90       | 17                                    | 66.3 ± 9.0   | 18                                | 68.6 ± 10.2  |
|                                   | F96       | 8                                     | 70.5 ± 8.9   | 7                                 | 75.4 ± 12.9  |
| Home average MAP (mmHg)           | B1        | 187                                   | 96.5 ± 8.4   | 184                               | 95.5 ± 7.8   |
|                                   | F5        | 207                                   | 90.4 ± 6.0   | 218                               | 91.7 ± 6.2   |
|                                   | F12       | 204                                   | 91.0 ± 5.9   | 210                               | 91.9 ± 4.9   |
|                                   | F18       | 200                                   | 91.6 ± 5.6   | 205                               | 92.1 ± 5.4   |
|                                   | F24       | 194                                   | 91.3 ± 6.0   | 207                               | 92.4 ± 5.1   |
|                                   | F30       | 188                                   | 92.0 ± 5.5   | 197                               | 92.7 ± 5.8   |
|                                   | F36       | 181                                   | 91.0 ± 5.4   | 196                               | 92.4 ± 5.7   |
|                                   | F42       | 174                                   | 91.7 ± 5.1   | 172                               | 92.7 ± 5.5   |
|                                   | F48       | 159                                   | 90.8 ± 5.9   | 162                               | 92.4 ± 5.4   |
|                                   | F54       | 150                                   | 92.2 ± 5.8   | 145                               | 92.9 ± 5.8   |
|                                   | F60       | 130                                   | 91.8 ± 5.3   | 129                               | 92.4 ± 5.5   |
|                                   | F66       | 107                                   | 92.8 ± 5.4   | 103                               | 92.8 ± 5.6   |
|                                   | F72       | 70                                    | 91.6 ± 5.8   | 84                                | 92.5 ± 4.9   |
|                                   | F78       | 54                                    | 92.4 ± 5.2   | 55                                | 93.6 ± 5.6   |
|                                   | F84       | 32                                    | 91.1 ± 4.9   | 33                                | 94.3 ± 4.9   |
|                                   | F90       | 18                                    | 90.3 ± 3.8   | 18                                | 93.5 ± 7.9   |
|                                   | F96       | 8                                     | 90.4 ± 7.7   | 7                                 | 94.6 ± 6.1   |
| Office average systolic BP (mmHg) | B1        | 244                                   | 129.8 ± 14.3 | 240                               | 128.3 ± 14.8 |
|                                   | F5        | 227                                   | 116.9 ± 12.9 | 231                               | 119.4 ± 12.7 |
|                                   | F12       | 222                                   | 118.5 ± 12.2 | 222                               | 118.6 ± 12.1 |
|                                   | F18       | 212                                   | 119.2 ± 11.5 | 223                               | 120.3 ± 12.9 |
|                                   | F24       | 208                                   | 118.5 ± 11.3 | 221                               | 119.6 ± 11.7 |
|                                   | F30       | 198                                   | 120.1 ± 11.9 | 206                               | 121.5 ± 13.4 |
|                                   | F36       | 196                                   | 120.2 ± 12.1 | 209                               | 121.2 ± 11.8 |
|                                   | F42       | 172                                   | 120.9 ± 11.7 | 184                               | 120.5 ± 12.7 |
|                                   | F48       | 176                                   | 119.7 ± 11.5 | 178                               | 120.7 ± 12.2 |

|                                    |           | Lisinopril/<br>Telmisartan<br>(n=244) |              | Lisinopril/<br>Placebo<br>(n=242) |              |
|------------------------------------|-----------|---------------------------------------|--------------|-----------------------------------|--------------|
| Measure                            | Timepoint | n                                     | Mean ± SD    | n                                 | Mean ± SD    |
|                                    | F54       | 163                                   | 120.3 ± 11.3 | 149                               | 122.0 ± 11.9 |
|                                    | F60       | 150                                   | 121.6 ± 10.7 | 148                               | 121.7 ± 12.4 |
|                                    | F66       | 119                                   | 122.2 ± 10.0 | 115                               | 122.6 ± 12.7 |
|                                    | F72       | 81                                    | 124.1 ± 12.0 | 88                                | 124.2 ± 12.0 |
|                                    | F78       | 65                                    | 126.9 ± 16.3 | 59                                | 121.8 ± 11.6 |
|                                    | F84       | 36                                    | 124.5 ± 13.1 | 37                                | 124.4 ± 11.8 |
|                                    | F90       | 24                                    | 125.6 ± 13.5 | 21                                | 120.9 ± 14.8 |
|                                    | F96       | 9                                     | 128.2 ± 11.4 | 7                                 | 115.1 ± 6.7  |
| Office average diastolic BP (mmHg) | B1        | 244                                   | 79.7 ± 10.6  | 240                               | 79.1 ± 9.7   |
|                                    | F5        | 227                                   | 72.8 ± 10.4  | 231                               | 75.3 ± 8.9   |
|                                    | F12       | 222                                   | 74.6 ± 9.8   | 222                               | 75.5 ± 9.2   |
|                                    | F18       | 212                                   | 75.4 ± 9.4   | 223                               | 76.7 ± 9.3   |
|                                    | F24       | 208                                   | 75.0 ± 9.5   | 221                               | 76.6 ± 7.8   |
|                                    | F30       | 198                                   | 76.3 ± 9.0   | 206                               | 78.0 ± 8.7   |
|                                    | F36       | 196                                   | 76.2 ± 9.3   | 209                               | 77.5 ± 8.6   |
|                                    | F42       | 172                                   | 76.9 ± 8.6   | 184                               | 77.4 ± 8.1   |
|                                    | F48       | 176                                   | 76.2 ± 8.7   | 178                               | 77.5 ± 9.2   |
|                                    | F54       | 163                                   | 76.9 ± 9.9   | 149                               | 78.9 ± 9.3   |
|                                    | F60       | 150                                   | 77.1 ± 8.4   | 148                               | 77.9 ± 8.4   |
|                                    | F66       | 119                                   | 76.3 ± 8.0   | 115                               | 78.1 ± 9.2   |
|                                    | F72       | 81                                    | 76.3 ± 9.4   | 88                                | 80.3 ± 8.4   |
|                                    | F78       | 65                                    | 77.5 ± 9.9   | 59                                | 79.0 ± 8.3   |
|                                    | F84       | 36                                    | 75.4 ± 7.5   | 37                                | 77.8 ± 8.7   |
|                                    | F90       | 24                                    | 74.4 ± 6.5   | 21                                | 75.7 ± 9.4   |
|                                    | F96       | 9                                     | 73.9 ± 10.6  | 7                                 | 73.2 ± 8.0   |
| Office average heart rate (bpm)    | B1        | 234                                   | 64.3 ± 11.3  | 235                               | 63.8 ± 10.3  |
|                                    | F5        | 223                                   | 69.2 ± 12.0  | 227                               | 67.4 ± 13.0  |
|                                    | F12       | 221                                   | 69.6 ± 12.7  | 222                               | 68.7 ± 12.4  |
|                                    | F18       | 211                                   | 68.6 ± 11.6  | 222                               | 68.2 ± 13.2  |
|                                    | F24       | 206                                   | 67.8 ± 11.5  | 220                               | 67.9 ± 12.9  |
|                                    | F30       | 197                                   | 67.6 ± 11.7  | 203                               | 66.6 ± 12.2  |
|                                    | F36       | 194                                   | 68.6 ± 12.1  | 209                               | 67.3 ± 12.7  |
|                                    | F42       | 171                                   | 67.5 ± 11.6  | 183                               | 66.3 ± 12.0  |
|                                    | F48       | 176                                   | 69.0 ± 12.3  | 178                               | 66.7 ± 12.1  |
|                                    | F54       | 163                                   | 68.3 ± 10.6  | 149                               | 67.0 ± 12.4  |
|                                    | F60       | 150                                   | 69.4 ± 11.6  | 147                               | 67.1 ± 11.7  |
|                                    | F66       | 119                                   | 68.5 ± 10.1  | 115                               | 66.2 ± 12.5  |
|                                    | F72       | 81                                    | 68.7 ± 11.1  | 88                                | 66.5 ± 11.2  |
|                                    | F78       | 65                                    | 67.0 ± 10.3  | 58                                | 68.6 ± 12.3  |
|                                    | F84       | 35                                    | 67.3 ± 10.8  | 36                                | 63.7 ± 12.6  |
|                                    | F90       | 24                                    | 65.9 ± 14.3  | 21                                | 66.1 ± 10.1  |

|                           |           | Lisinopril/<br>Telmisartan<br>(n=244) |             | Lisinopril/<br>Placebo<br>(n=242) |             |
|---------------------------|-----------|---------------------------------------|-------------|-----------------------------------|-------------|
| Measure                   | Timepoint | n                                     | Mean ± SD   | n                                 | Mean ± SD   |
|                           | F96       | 9                                     | 63.4 ± 10.3 | 7                                 | 74.6 ± 13.8 |
| Office average MAP (mmHg) | B1        | 244                                   | 96.4 ± 10.6 | 240                               | 95.5 ± 10.3 |
|                           | F5        | 227                                   | 87.5 ± 10.4 | 231                               | 90.0 ± 9.1  |
|                           | F12       | 222                                   | 89.2 ± 9.3  | 222                               | 89.9 ± 9.2  |
|                           | F18       | 212                                   | 90.0 ± 9.0  | 223                               | 91.2 ± 9.6  |
|                           | F24       | 208                                   | 89.5 ± 9.1  | 221                               | 90.9 ± 8.0  |
|                           | F30       | 198                                   | 90.9 ± 9.1  | 206                               | 92.5 ± 9.1  |
|                           | F36       | 196                                   | 90.9 ± 9.2  | 209                               | 92.1 ± 8.5  |
|                           | F42       | 172                                   | 91.6 ± 8.6  | 184                               | 91.8 ± 8.7  |
|                           | F48       | 176                                   | 90.7 ± 8.4  | 178                               | 91.9 ± 9.0  |
|                           | F54       | 163                                   | 91.4 ± 9.6  | 149                               | 93.3 ± 9.2  |
|                           | F60       | 150                                   | 91.9 ± 7.8  | 148                               | 92.5 ± 8.5  |
|                           | F66       | 119                                   | 91.6 ± 7.5  | 115                               | 92.9 ± 9.3  |
|                           | F72       | 81                                    | 92.2 ± 9.0  | 88                                | 95.0 ± 8.7  |
|                           | F78       | 65                                    | 93.9 ± 10.9 | 59                                | 93.3 ± 8.5  |
|                           | F84       | 36                                    | 91.7 ± 8.5  | 37                                | 93.3 ± 8.8  |
|                           | F90       | 24                                    | 91.5 ± 7.6  | 21                                | 90.8 ± 10.9 |
|                           | F96       | 9                                     | 92.0 ± 9.3  | 7                                 | 87.2 ± 7.1  |

|                          |           | Lisinopril/<br>Telmisartan<br>(n=244) |             | Lisinopril/<br>Placebo<br>(n=242) |             |
|--------------------------|-----------|---------------------------------------|-------------|-----------------------------------|-------------|
| Measure                  | Timepoint | n                                     | Mean ± SD   | n                                 | Mean ± SD   |
| BP Step                  | B1        | 225                                   | 1.4 ± 0.7   | 222                               | 1.3 ± 0.7   |
|                          | F12       | 216                                   | 2.8 ± 2.4   | 218                               | 3.2 ± 2.3   |
|                          | F24       | 208                                   | 3.0 ± 2.5   | 213                               | 3.3 ± 2.4   |
|                          | F36       | 189                                   | 2.9 ± 2.5   | 200                               | 3.4 ± 2.6   |
|                          | F48       | 172                                   | 2.8 ± 2.4   | 174                               | 3.3 ± 2.5   |
|                          | F60       | 144                                   | 2.7 ± 2.2   | 142                               | 3.1 ± 2.4   |
|                          | F72       | 75                                    | 2.3 ± 1.9   | 87                                | 2.7 ± 2.2   |
|                          | F84       | 33                                    | 2.3 ± 2.1   | 35                                | 2.9 ± 2.6   |
|                          | F96       | 8                                     | 1.1 ± 1.6   | 7                                 | 1.7 ± 2.0   |
| Lisinopril dose (mg/day) | B1        | 222                                   | 6.9 ± 4.9   | 214                               | 6.6 ± 4.6   |
|                          | F12       | 176                                   | 17.7 ± 15.7 | 204                               | 19.6 ± 15.8 |
|                          | F24       | 172                                   | 16.7 ± 15.0 | 194                               | 19.1 ± 15.1 |
|                          | F36       | 154                                   | 16.9 ± 15.9 | 183                               | 17.8 ± 15.3 |
|                          | F48       | 135                                   | 15.1 ± 14.7 | 163                               | 17.9 ± 15.4 |
|                          | F60       | 113                                   | 14.7 ± 14.0 | 130                               | 17.1 ± 16.1 |
|                          | F72       | 59                                    | 15.2 ± 14.2 | 81                                | 13.8 ± 14.5 |
|                          | F84       | 24                                    | 15.9 ± 15.0 | 28                                | 18.7 ± 16.4 |

|                                    |           | Lisinopril/<br>Telmisartan<br>(n=244) |             | Lisinopril/<br>Placebo<br>(n=242) |             |
|------------------------------------|-----------|---------------------------------------|-------------|-----------------------------------|-------------|
| Measure                            | Timepoint | n                                     | Mean ± SD   | n                                 | Mean ± SD   |
|                                    | F96       | 3                                     | 14.2 ± 22.4 | 6                                 | 14.2 ± 15.6 |
| Telmisartan/Placebo dose (mg/day)* | B1        | 220                                   | 41.0 ± 6.0  | 214                               | 40.9 ± 6.1  |
|                                    | F12       | 205                                   | 54.3 ± 21.0 | 209                               | 58.3 ± 20.1 |
|                                    | F24       | 195                                   | 53.2 ± 21.2 | 203                               | 58.7 ± 20.4 |
|                                    | F36       | 176                                   | 53.1 ± 20.7 | 184                               | 57.7 ± 20.2 |
|                                    | F48       | 162                                   | 51.6 ± 21.4 | 163                               | 56.9 ± 20.7 |
|                                    | F60       | 131                                   | 47.8 ± 24.8 | 132                               | 54.1 ± 21.2 |
|                                    | F72       | 68                                    | 46.0 ± 23.2 | 77                                | 45.7 ± 27.3 |
|                                    | F84       | 29                                    | 43.4 ± 25.1 | 32                                | 43.1 ± 26.0 |
|                                    | F96       | 7                                     | 17.1 ± 21.4 | 6                                 | 6.7 ± 16.3  |

\*Thirty (86%) of the 35 participants that discontinued study drug before the end of follow-up did so due to the following reasons: hypertension, hypotension, hyperkalemia, or intolerable side effects. The remaining 5 did not specify a reason.

**Table S4: Percentage of patients on medication step  $\leq 4$  by treatment group and visit.**

| Timepoint | Lisinopril/Telmisartan<br>(n=244) |      | Lisinopril/Placebo<br>(n = 242) |     |
|-----------|-----------------------------------|------|---------------------------------|-----|
|           | n                                 | (%)  | n                               | (%) |
| B1        | 225                               | 100% | 222                             | 99% |
| F5        | 217                               | 77%  | 226                             | 79% |
| F12       | 216                               | 77%  | 218                             | 75% |
| F18       | 213                               | 76%  | 215                             | 74% |
| F24       | 208                               | 75%  | 213                             | 72% |
| F30       | 200                               | 77%  | 209                             | 71% |
| F36       | 189                               | 78%  | 200                             | 73% |
| F42       | 187                               | 77%  | 185                             | 72% |
| F48       | 172                               | 78%  | 174                             | 71% |
| F54       | 158                               | 78%  | 155                             | 72% |
| F60       | 144                               | 81%  | 142                             | 72% |
| F66       | 116                               | 84%  | 113                             | 76% |
| F72       | 75                                | 85%  | 87                              | 80% |
| F78       | 63                                | 86%  | 57                              | 79% |
| F84       | 33                                | 88%  | 35                              | 80% |
| F90       | 20                                | 90%  | 20                              | 85% |
| F96       | 8                                 | 88%  | 7                               | 86% |

**Table S5A: Percentage of patients categorized by dose of lisinopril\*, treatment group and visit.**

| Visit | N   | Lisinopril/Telmisartan |            |            |            | Lisinopril/Placebo |            |            |            | P     |
|-------|-----|------------------------|------------|------------|------------|--------------------|------------|------------|------------|-------|
|       |     | 5mg                    | 10 mg      | 20 mg      | 40 mg      | 5mg                | 10 mg      | 20 mg      | 40 mg      |       |
| B1    | 422 | 160 (73.4%)            | 50 (22.9%) | 5 (2.3%)   | 3 (1.4%)   | 156 (76.5%)        | 39 (19.1%) | 7 (3.4%)   | 2 (1.0%)   | 0.69  |
| F12   | 272 | 37 (30.1%)             | 21 (17.1%) | 12 (9.8%)  | 53 (43.1%) | 38 (25.5%)         | 21 (14.1%) | 28 (18.8%) | 62 (41.6%) | 0.20  |
| F24   | 255 | 37 (30.6%)             | 21 (17.4%) | 19 (15.7%) | 44 (36.4%) | 35 (26.1%)         | 24 (17.9%) | 20 (14.9%) | 55 (41.0%) | 0.84  |
| F36   | 226 | 30 (30.0%)             | 15 (15.0%) | 17 (17.0%) | 38 (38.0%) | 29 (23.0%)         | 29 (23.0%) | 18 (14.3%) | 50 (39.7%) | 0.36  |
| F48   | 192 | 24 (28.9%)             | 13 (15.7%) | 17 (20.5%) | 29 (34.9%) | 24 (22.0%)         | 18 (16.5%) | 22 (20.2%) | 45 (41.3%) | 0.70  |
| F60   | 152 | 22 (32.8%)             | 12 (17.9%) | 13 (19.4%) | 20 (29.9%) | 23 (27.1%)         | 15 (17.6%) | 15 (17.6%) | 32 (37.6%) | 0.76  |
| F72   | 82  | 9 (25.7%)              | 6 (17.1%)  | 10 (28.6%) | 10 (28.6%) | 15 (31.9%)         | 10 (21.3%) | 7 (14.9%)  | 15 (31.9%) | 0.51  |
| F84   | 34  | 5 (33.3%)              | 1 (6.7%)   | 4 (26.7%)  | 5 (33.3%)  | 2 (10.5%)          | 5 (26.3%)  | 3 (15.8%)  | 9 (47.4%)  | 0.18  |
| F96   | 5   | 0 (0.0%)               | 0 (0.0%)   | 0 (0.0%)   | 1 (100%)   | 1 (25.0%)          | 0 (0.0%)   | 2 (50.0%)  | 1 (25.0%)  | >0.99 |

\* participants with daily doses other than 5, 10, 20 or 40 mg are not included

**Table S5B: Percentage of patients categorized by dose of telmisartan/placebo\*, treatment group and visit.**

| Timepoint | Frequency | Lisinopril/Telmisartan |            | Lisinopril/Placebo |            | P     |
|-----------|-----------|------------------------|------------|--------------------|------------|-------|
|           |           | 40 mg                  | 80 mg      | 40 mg              | 80 mg      |       |
| B1        | 432       | 213 (97.7%)            | 5 (2.3%)   | 209 (97.7%)        | 5 (2.3%)   | 0.98  |
| F12       | 406       | 126 (63.6%)            | 72 (36.4%) | 112 (53.8%)        | 96 (46.2%) | 0.05  |
| F24       | 385       | 113 (61.4%)            | 71 (38.6%) | 105 (52.2%)        | 96 (47.8%) | 0.07  |
| F36       | 348       | 103 (62.0%)            | 63 (38.0%) | 100 (54.9%)        | 82 (45.1%) | 0.18  |
| F48       | 308       | 93 (62.8%)             | 55 (37.2%) | 89 (55.6%)         | 71 (44.4%) | 0.20  |
| F60       | 235       | 65 (60.7%)             | 42 (39.3%) | 78 (60.9%)         | 50 (39.1%) | 0.98  |
| F72       | 121       | 39 (68.4%)             | 18 (31.6%) | 40 (62.5%)         | 24 (37.5%) | 0.50  |
| F84       | 50        | 17 (70.8%)             | 7 (29.2%)  | 18 (69.2%)         | 8 (30.8%)  | >0.99 |
| F96       | 4         | 3 (100%)               | 0 (0.0%)   | 1 (100%)           | 0 (0.0%)   | **    |

\* Participants with daily doses other than 40 or 80 mg are not included

\*\* P-value was not calculated as there were no participants taking 80 mg at F96.

**Table S6: Open label anti-hypertensive agents added at any time after maximal doses of lisinopril and telmisartan/placebo**

| <b>Measure</b>                      | <b>Lisinopril/<br/>Telmisartan<br/>(n=244)</b> | <b>Lisinopril/<br/>Placebo<br/>(n=242)</b> |                |
|-------------------------------------|------------------------------------------------|--------------------------------------------|----------------|
|                                     | <b>n (%)</b>                                   | <b>n (%)</b>                               | <b>p value</b> |
| Diuretic                            | 92 (37.7%)                                     | 113 (46.7%)                                | 0.04           |
| Beta- or alpha/beta blocker         | 56 (23.0%)                                     | 75 (31.0%)                                 | 0.05           |
| Calcium channel blocker             | 36 (14.8%)                                     | 44 (18.2%)                                 | 0.31           |
| Central alpha 2 adrenergic agonist  | 15 (6.1%)                                      | 21 (8.7%)                                  | 0.29           |
| Vasodilator                         | 8 (3.3%)                                       | 12 (5.0%)                                  | 0.35           |
| Alpha 1 adrenergic receptor blocker | 1 (0.4%)                                       | 7 (2.9%)                                   | 0.03           |



**Table S7A: Secondary outcomes of eGFR, urine albumin excretion, frequencies of PKD related symptoms, pain, and quality of life.** Participants were asked about the occurrence of symptoms during the prior 3 months at every study visit per protocol.

|                                                |     | Lisinopril/<br>Telmisartan<br>(n=244) |                                                    | Lisinopril/<br>Placebo<br>(n=242) |                                                    |
|------------------------------------------------|-----|---------------------------------------|----------------------------------------------------|-----------------------------------|----------------------------------------------------|
|                                                |     | n                                     | Mean ± SD                                          | n                                 | Mean ± SD                                          |
| <b>CKD EPI eGFR (ml/min/1.73m<sup>2</sup>)</b> | B1  | 244                                   | 48.5 ± 11.5                                        | 242                               | 47.9 ± 12.2                                        |
|                                                | F5  | 226                                   | 46.5 ± 11.8                                        | 231                               | 46.0 ± 12.0                                        |
|                                                | F12 | 222                                   | 44.0 ± 12.8                                        | 222                               | 43.3 ± 12.9                                        |
|                                                | F18 | 216                                   | 42.4 ± 13.6                                        | 222                               | 41.3 ± 13.6                                        |
|                                                | F24 | 208                                   | 40.8 ± 12.9                                        | 221                               | 40.4 ± 14.5                                        |
|                                                | F30 | 205                                   | 38.9 ± 13.1                                        | 212                               | 39.0 ± 15.3                                        |
|                                                | F36 | 198                                   | 38.6 ± 13.3                                        | 211                               | 37.5 ± 14.8                                        |
|                                                | F42 | 185                                   | 37.2 ± 13.1                                        | 187                               | 36.6 ± 14.4                                        |
|                                                | F48 | 179                                   | 37.0 ± 13.5                                        | 182                               | 35.7 ± 13.7                                        |
|                                                | F54 | 167                                   | 35.8 ± 12.8                                        | 156                               | 36.3 ± 13.7                                        |
|                                                | F60 | 153                                   | 36.2 ± 12.9                                        | 150                               | 35.9 ± 13.2                                        |
|                                                | F66 | 121                                   | 35.8 ± 12.2                                        | 115                               | 36.0 ± 13.7                                        |
|                                                | F72 | 82                                    | 37.6 ± 11.4                                        | 90                                | 36.5 ± 12.1                                        |
|                                                | F78 | 64                                    | 37.1 ± 11.8                                        | 59                                | 35.8 ± 12.2                                        |
|                                                | F84 | 36                                    | 35.2 ± 11.5                                        | 37                                | 36.6 ± 12.1                                        |
|                                                | F90 | 24                                    | 36.9 ± 10.2                                        | 21                                | 37.2 ± 13.6                                        |
|                                                | F96 | 10                                    | 34.1 ± 8.8                                         | 7                                 | 35.7 ± 12.5                                        |
|                                                |     | <b>n</b>                              | <b>Median (25<sup>th</sup> , 75<sup>th</sup> )</b> | <b>n</b>                          | <b>Median (25<sup>th</sup> , 75<sup>th</sup> )</b> |
| <b>Urine albumin (mg/24 hrs)</b>               | B1  | 237                                   | 29.7 ( 16.6, 71.8)                                 | 225                               | 28.1 ( 17.3, 78.0)                                 |
|                                                | F5  | 214                                   | 27.1 ( 14.0, 51.2)                                 | 220                               | 27.4 ( 17.1, 55.0)                                 |
|                                                | F12 | 208                                   | 22.6 ( 13.1, 56.0)                                 | 199                               | 30.7 ( 15.0, 54.0)                                 |
|                                                | F24 | 184                                   | 22.9 ( 10.3, 59.0)                                 | 190                               | 29.7 ( 13.7, 63.7)                                 |
|                                                | F36 | 166                                   | 27.7 ( 13.5, 72.1)                                 | 187                               | 34.8 ( 14.6, 92.9)                                 |

|                                         |     | Lisinopril/<br>Telmisartan<br>(n=244) |                     | Lisinopril/<br>Placebo<br>(n=242) |                     |
|-----------------------------------------|-----|---------------------------------------|---------------------|-----------------------------------|---------------------|
|                                         | F48 | 159                                   | 28.2 ( 12.7, 73.9)  | 164                               | 32.8 ( 13.2, 86.2)  |
|                                         | F60 | 140                                   | 36.2 ( 14.0, 104.8) | 140                               | 28.1 ( 15.3, 83.5)  |
|                                         | F72 | 75                                    | 34.2 ( 15.7, 100.3) | 84                                | 29.2 ( 13.3, 56.3)  |
|                                         | F84 | 34                                    | 48.6 ( 24.4, 111.2) | 37                                | 33.0 ( 13.3, 125.4) |
|                                         | F96 | 9                                     | 39.2 ( 12.8, 80.3)  | 7                                 | 61.0 ( 22.8, 115.3) |
|                                         |     | <b>n</b>                              | <b>%</b>            | <b>n</b>                          | <b>%</b>            |
| <b>Kidney Pain (Back or Flank Pain)</b> | B1  | 93                                    | 38.11               | 74                                | 30.96               |
|                                         | F12 | 101                                   | 45.70               | 99                                | 44.39               |
|                                         | F24 | 99                                    | 46.70               | 102                               | 46.15               |
|                                         | F36 | 85                                    | 42.71               | 88                                | 42.31               |
|                                         | F48 | 82                                    | 45.81               | 79                                | 42.93               |
|                                         | F60 | 69                                    | 45.10               | 64                                | 43.24               |
|                                         | F72 | 38                                    | 46.91               | 34                                | 37.78               |
|                                         | F84 | 14                                    | 37.84               | 10                                | 27.03               |
|                                         | F96 | 2                                     | 22.22               | 2                                 | 28.57               |
| <b>Blood in Urine/Hematuria</b>         | B1  | 9                                     | 3.69                | 8                                 | 3.33                |
|                                         | F12 | 15                                    | 6.79                | 18                                | 8.07                |
|                                         | F24 | 14                                    | 6.57                | 16                                | 7.17                |
|                                         | F36 | 9                                     | 4.50                | 24                                | 11.43               |
|                                         | F48 | 14                                    | 7.73                | 11                                | 5.98                |
|                                         | F60 | 9                                     | 5.88                | 9                                 | 5.96                |
|                                         | F72 | 1                                     | 1.22                | 4                                 | 4.44                |
|                                         | F84 | 1                                     | 2.70                | 2                                 | 5.41                |
|                                         | F96 | 0                                     | 0.00                | 2                                 | 28.57               |
| <b>Urinary tract infection</b>          | B1  | 5                                     | 2.05                | 5                                 | 2.08                |
|                                         | F12 | 14                                    | 6.39                | 9                                 | 4.04                |
|                                         | F24 | 7                                     | 3.29                | 15                                | 6.73                |

|                                                    |     |     | Lisinopril/<br>Telmisartan<br>(n=244) |     | Lisinopril/<br>Placebo<br>(n=242) |
|----------------------------------------------------|-----|-----|---------------------------------------|-----|-----------------------------------|
|                                                    | F36 | 9   | 4.50                                  | 8   | 3.81                              |
|                                                    | F48 | 7   | 3.87                                  | 11  | 5.98                              |
|                                                    | F60 | 8   | 5.23                                  | 9   | 5.96                              |
|                                                    | F72 | 1   | 1.22                                  | 5   | 5.56                              |
|                                                    | F84 | 0   | 0.00                                  | 3   | 8.11                              |
|                                                    | F96 | 0   | 0.00                                  | 0   | 0.00                              |
| <b>Kidney stone(s)</b>                             | B1  | 2   | 0.82                                  | 5   | 2.09                              |
|                                                    | F12 | 6   | 2.73                                  | 8   | 3.59                              |
|                                                    | F24 | 2   | 0.94                                  | 4   | 1.79                              |
|                                                    | F36 | 0   | 0.00                                  | 4   | 1.90                              |
|                                                    | F48 | 5   | 2.76                                  | 4   | 2.17                              |
|                                                    | F60 | 1   | 0.65                                  | 2   | 1.32                              |
|                                                    | F72 | 1   | 1.22                                  | 3   | 3.33                              |
|                                                    | F84 | 0   | 0.00                                  | 1   | 2.70                              |
|                                                    | F96 | 0   | 0.00                                  | 0   | 0.00                              |
| <b>Experienced back pain in past 3 months</b>      | B1  | 189 | 80.77                                 | 179 | 76.50                             |
|                                                    | F12 | 177 | 81.94                                 | 166 | 74.77                             |
|                                                    | F24 | 159 | 76.08                                 | 173 | 78.28                             |
|                                                    | F36 | 157 | 78.89                                 | 151 | 72.60                             |
|                                                    | F48 | 133 | 73.89                                 | 138 | 74.59                             |
|                                                    | F60 | 109 | 71.24                                 | 112 | 74.17                             |
|                                                    | F72 | 59  | 71.95                                 | 55  | 61.80                             |
|                                                    | F84 | 26  | 72.22                                 | 24  | 66.67                             |
|                                                    | F96 | 4   | 44.44                                 | 3   | 42.86                             |
| <b>Experienced radiating pain in past 3 months</b> | B1  | 78  | 33.91                                 | 66  | 28.21                             |
|                                                    | F12 | 83  | 39.15                                 | 62  | 28.05                             |
|                                                    | F24 | 59  | 28.64                                 | 76  | 34.70                             |

|                                                    |     | Lisinopril/<br>Telmisartan<br>(n=244) |                  | Lisinopril/<br>Placebo<br>(n=242) |                  |
|----------------------------------------------------|-----|---------------------------------------|------------------|-----------------------------------|------------------|
|                                                    | F36 | 62                                    | 31.96            | 72                                | 35.64            |
|                                                    | F48 | 58                                    | 33.33            | 47                                | 25.82            |
|                                                    | F60 | 44                                    | 29.73            | 46                                | 30.87            |
|                                                    | F72 | 28                                    | 35.00            | 23                                | 27.06            |
|                                                    | F84 | 8                                     | 21.62            | 8                                 | 22.22            |
|                                                    | F96 | 0                                     | 0.00             | 1                                 | 14.29            |
| <b>Experienced abdominal pain in past 3 months</b> | B1  | 117                                   | 50.43            | 102                               | 43.59            |
|                                                    | F12 | 96                                    | 44.86            | 104                               | 47.27            |
|                                                    | F24 | 101                                   | 48.56            | 110                               | 49.55            |
|                                                    | F36 | 104                                   | 52.79            | 99                                | 48.29            |
|                                                    | F48 | 88                                    | 49.44            | 89                                | 48.37            |
|                                                    | F60 | 79                                    | 53.02            | 70                                | 46.98            |
|                                                    | F72 | 44                                    | 55.00            | 35                                | 40.23            |
|                                                    | F84 | 15                                    | 40.54            | 15                                | 40.54            |
|                                                    | F96 | 4                                     | 50.00            | 3                                 | 42.86            |
|                                                    |     | <b>n</b>                              | <b>Mean ± SD</b> | <b>n</b>                          | <b>Mean ± SD</b> |
| <b>SF36v2 Physical Component</b>                   | B1  | 238                                   | 50.3 ± 8.0       | 238                               | 50.5 ± 8.3       |
|                                                    | F12 | 216                                   | 50.2 ± 7.5       | 222                               | 50.6 ± 7.9       |
|                                                    | F24 | 206                                   | 49.9 ± 8.5       | 221                               | 49.6 ± 8.7       |
|                                                    | F36 | 197                                   | 49.4 ± 8.6       | 206                               | 49.4 ± 9.2       |
|                                                    | F48 | 179                                   | 49.2 ± 9.3       | 183                               | 48.1 ± 9.8       |
|                                                    | F60 | 148                                   | 47.9 ± 9.8       | 149                               | 48.0 ± 10.9      |
|                                                    | F72 | 82                                    | 46.7 ± 10.9      | 89                                | 48.1 ± 10.5      |
|                                                    | F84 | 36                                    | 48.4 ± 9.9       | 37                                | 50.1 ± 7.9       |
|                                                    | F96 | 8                                     | 45.4 ± 14.3      | 7                                 | 52.9 ± 5.0       |
| <b>SF36v2 Mental Component</b>                     | B1  | 238                                   | 52.1 ± 9.1       | 238                               | 51.8 ± 8.6       |
|                                                    | F12 | 216                                   | 51.8 ± 8.7       | 222                               | 52.3 ± 8.4       |

|  |     | <b>Lisinopril/<br/>Telmisartan<br/>(n=244)</b> |            | <b>Lisinopril/<br/>Placebo<br/>(n=242)</b> |            |
|--|-----|------------------------------------------------|------------|--------------------------------------------|------------|
|  | F24 | 206                                            | 52.1 ± 9.2 | 221                                        | 52.2 ± 8.5 |
|  | F36 | 197                                            | 52.4 ± 9.2 | 206                                        | 52.1 ± 8.2 |
|  | F48 | 179                                            | 51.8 ± 9.5 | 183                                        | 51.9 ± 8.8 |
|  | F60 | 148                                            | 52.3 ± 9.3 | 149                                        | 51.8 ± 8.4 |
|  | F72 | 82                                             | 51.9 ± 9.2 | 89                                         | 53.2 ± 6.7 |
|  | F84 | 36                                             | 53.0 ± 7.7 | 37                                         | 53.4 ± 7.4 |
|  | F96 | 8                                              | 54.5 ± 7.5 | 7                                          | 54.5 ± 7.6 |

**Table S7B: Results of models testing secondary outcomes of eGFR, urine albumin excretion, frequencies of PKD related symptoms, pain, and quality of life.** Below are per-month slopes (unless otherwise specified) along with corresponding p-values. Differences in slopes between Lisinopril/telmisartan and Lisinopril/placbo are also estimated and assessed for significance. For continuous outcomes (eGFR, urine albumin, PCS, and MCS), the slopes are presented as a per-month or per-year increase in the outcome; for binary outcomes, the slopes are presented as a per-month change in the odds of the outcome.

| Outcome                                        | Label                                        | Estimate/OR | Lower CL | Upper CL | p value |
|------------------------------------------------|----------------------------------------------|-------------|----------|----------|---------|
| <b>CKD EPI eGFR (ml/min/1.73m<sup>2</sup>)</b> | Lisinopril/placebo slope (per yr)            | -3.9074     | -4.1693  | -3.6454  | <.0001  |
|                                                | Lisinopril/telmisartan slope (per yr)        | -3.8735     | -4.1394  | -3.6076  | <.0001  |
|                                                | Lisinopril/telmisartan vs Lisinopril/placebo | 0.0339      | -0.3396  | 0.4074   | 0.8585  |
| <b>Log Urine Albumin (mg/24 hrs)</b>           | Lisinopril/placebo slope                     | 0.0060      | 0.0042   | 0.0079   | <.0001  |
|                                                | Lisinopril/telmisartan slope                 | 0.0059      | 0.0040   | 0.0077   | <.0001  |
|                                                | Lisinopril/telmisartan vs Lisinopril/placebo | -0.0002     | -0.0027  | 0.0023   | 0.8806  |
| <b>Kidney Pain (Back or Flank Pain)</b>        | Lisinopril/placebo slope                     | 1.01        | 1.01     | 1.01     | <.0001  |
|                                                | Lisinopril/telmisartan slope                 | 1.01        | 1.00     | 1.01     | 0.0002  |
|                                                | Lisinopril/telmisartan vs Lisinopril/placebo | 1.00        | 0.99     | 1.00     | 0.6423  |
| <b>Blood in Urine/Hematuria</b>                | Lisinopril/placebo slope                     | 1.01        | 1.00     | 1.01     | 0.0874  |
|                                                | Lisinopril/telmisartan slope                 | 1.00        | 1.00     | 1.01     | 0.5670  |
|                                                | Lisinopril/telmisartan vs Lisinopril/placebo | 1.00        | 0.99     | 1.00     | 0.3433  |
| <b>Urinary Tract Infection</b>                 | Lisinopril/placebo slope                     | 1.01        | 1.00     | 1.01     | 0.1233  |
|                                                | Lisinopril/telmisartan slope                 | 1.00        | 0.99     | 1.01     | 0.5482  |
|                                                | Lisinopril/telmisartan vs Lisinopril/placebo | 1.00        | 0.99     | 1.01     | 0.4375  |
| <b>Kidney stone(s)</b>                         | Lisinopril/placebo slope                     | 1.00        | 0.99     | 1.01     | 0.7673  |

| Outcome                                                | Label                                           | Estimate/OR | Lower CL | Upper CL | p value |
|--------------------------------------------------------|-------------------------------------------------|-------------|----------|----------|---------|
|                                                        | Lisinopril/telmisartan slope                    | 0.99        | 0.98     | 1.00     | 0.0483  |
|                                                        | Lisinopril/telmisartan vs<br>Lisinopril/placebo | 0.99        | 0.97     | 1.00     | 0.0647  |
| <b>Experienced back pain in<br/>past 3 months</b>      | Lisinopril/placebo slope                        | 0.99        | 0.99     | 1.00     | 0.0171  |
|                                                        | Lisinopril/telmisartan slope                    | 0.99        | 0.99     | 1.00     | 0.0045  |
|                                                        | Lisinopril/telmisartan vs<br>Lisinopril/placebo | 1.00        | 0.99     | 1.01     | 0.6378  |
| <b>Experienced radiating<br/>pain in past 3 months</b> | Lisinopril/placebo slope                        | 1.00        | 0.99     | 1.01     | 0.8228  |
|                                                        | Lisinopril/telmisartan slope                    | 1.00        | 0.99     | 1.00     | 0.6308  |
|                                                        | Lisinopril/telmisartan vs<br>Lisinopril/placebo | 1.00        | 0.99     | 1.01     | 0.8404  |
| <b>Experienced abdominal<br/>pain in past 3 months</b> | Lisinopril/placebo slope                        | 1.00        | 1.00     | 1.01     | 0.1099  |
|                                                        | Lisinopril/telmisartan slope                    | 1.01        | 1.00     | 1.01     | 0.0066  |
|                                                        | Lisinopril/telmisartan vs<br>Lisinopril/placebo | 1.00        | 1.00     | 1.01     | 0.3470  |
| <b>SF36 PCS</b>                                        | Lisinopril/placebo slope                        | -0.0537     | -0.0655  | -0.0420  | <.0001  |
|                                                        | Lisinopril/telmisartan slope                    | -0.0565     | -0.0699  | -0.0430  | <.0001  |
|                                                        | Lisinopril/telmisartan vs<br>Lisinopril/placebo | -0.0027     | -0.0192  | 0.0137   | 0.7462  |
| <b>SF36 MCS</b>                                        | Lisinopril/placebo slope                        | -0.0026     | -0.0156  | 0.0103   | 0.6896  |
|                                                        | Lisinopril/telmisartan slope                    | -0.0066     | -0.0198  | 0.0067   | 0.3324  |
|                                                        | Lisinopril/telmisartan vs<br>Lisinopril/placebo | -0.0039     | -0.0216  | 0.0137   | 0.6628  |

**Table S8: Common symptoms reported by participants (participants were asked about presence of symptoms every 3 months).**

|                                              | Lisinopril/<br>Telmisartan<br>(n=244) | Lisinopril/<br>Placebo<br>(n=242) |
|----------------------------------------------|---------------------------------------|-----------------------------------|
| <b>Follow-up duration (average years)</b>    | 5.1                                   | 5.2                               |
|                                              |                                       |                                   |
| <b>Symptoms</b>                              |                                       |                                   |
| Any instances of malaise/feeling ill         |                                       |                                   |
| Number of events                             | 918                                   | 994                               |
| Percent of participants affected             | 84.4%                                 | 85.5%                             |
| Any instances of headache                    |                                       |                                   |
| Number of events                             | 1045                                  | 1193                              |
| Percent of participants affected             | 73.8%                                 | 79.3%                             |
| Any instances of nasal congestion            |                                       |                                   |
| Number of events                             | 1220                                  | 1076                              |
| Percent of participants affected             | 82.4%                                 | 83.5%                             |
| Any instances of dizziness/lightheadedness   |                                       |                                   |
| Number of events                             | 794                                   | 744                               |
| Percent of participants affected             | 75.8%                                 | 70.2%                             |
| Any instances of cough                       |                                       |                                   |
| Number of events                             | 860                                   | 896                               |
| Percent of participants affected             | 77.9%                                 | 76.9%                             |
| Any instances of joint pain/aches            |                                       |                                   |
| Number of events                             | 1431                                  | 1156                              |
| Percent of participants affected             | 77.9%                                 | 79.8%                             |
| Any instances of kidney pain (back or flank) |                                       |                                   |
| Number of events                             | 1876                                  | 1863                              |
| Percent of participants affected             | 84.4%                                 | 83.1%                             |



**Table S9: Adverse events with potentially increased risk previously found to be associated with study drug**

|                                                 | <b>Lisinopril/<br/>Telmisartan<br/>(n=244)</b> | <b>Lisinopril/<br/>Placebo<br/>(n=242)</b> |
|-------------------------------------------------|------------------------------------------------|--------------------------------------------|
| <b>Hyperkalemia – Any</b>                       |                                                |                                            |
| Number of participants affected                 | 46 (18.9%)                                     | 41 (16.9%)                                 |
| Number of events                                | 70                                             | 65                                         |
| Mild (<5.6 mEq/L)                               | 61                                             | 60                                         |
| Moderate (5.6-6.5 mEq/L)                        | 9                                              | 4                                          |
| Severe (>6.5 mEq/L)                             | 0                                              | 1                                          |
| <b>Acute kidney injury (AKI)</b>                |                                                |                                            |
| Number of participants affected                 | 22 (9.0%)                                      | 32 (13.2%)                                 |
| Number of events                                | 31                                             | 51                                         |
| Mild (s. creat. Increase >0.3-1 mg/dl)          | 10                                             | 17                                         |
| Moderate (s. creat. Increase >1-2 mg/dl)        | 8                                              | 14                                         |
| Severe (s. creat. Increase >2 mg/dl)            | 3                                              | 4                                          |
| <b>Cancer (number of participants affected)</b> | 9 (3.7%)                                       | 7 (2.9%)                                   |
| Melanoma                                        | 0 (0.0%)                                       | 2 (0.8%)                                   |
| Breast                                          | 3 (1.2%)                                       | 2 (0.8%)                                   |
| Prostate                                        | 2 (0.8%)                                       | 1 (0.4%)                                   |
| Kidney                                          | 0 (0%)                                         | 1 (0.4%)                                   |
| Bladder                                         | 1 (0.4%)                                       | 0 (0%)                                     |
| Lung                                            | 0 (0%)                                         | 1 (0.4%)                                   |
| Other                                           | 3 (1.2%)                                       | 0 (0%)                                     |
